# Supplementary material for: The dead and the dying - a difficult part of EMS transport: A Swiss cross-sectional study
Source: PubMed Central journal article supplement (PMC5828436; doi:10.1371/journal.pone.0191879), 2018-02-27
Supplement: pone.0191879.s001.pdf [file pone.0191879.s001.pdf]

| Patient numk | Year | Time of start | Arrival operati | Departure ope | Arrival ED | Time to opera |
|--------------|------|---------------|-----------------|---------------|------------|---------------|
| 1            | 2008 | 02:50         | 02:58           | 03:59         | 04:05      | 00:08         |
| 2            | 2008 | 13:56         | 14:03           | 14:25         | 14:30      | 00:06         |
| 3            | 2008 | 15:25         | 15:55           | 16:15         | 16:32      | 00:30         |
| 4            | 2008 | 20:13         | 20:18           | 20:45         | 20:50      | 00:05         |
| 5            | 2008 | 19:24         | 19:26           | 19:35         | 19:40      | 00:02         |
| 6            | 2008 | 12:33         | 12:45           | 13:25         | 13:35      | 00:12         |
| 7            | 2008 | 14:08         | 14:15           | 14:30         | 14:35      | 00:07         |
| 8            | 2008 | 08:40         | 08:44           | 08:57         | 09:11      | 00:04         |
| 9            | 2008 | 01:48         | 01:56           | 02:20         | 02:30      | 00:08         |
| 10           | 2008 | 19:53         | 20:10           | 20:17         | 20:30      | 00:17         |
| 11           | 2008 | 17:32         | 17:36           | 17:50         | 17:55      | 00:04         |
| 12           | 2008 | 11:18         | 11:32           | 11:55         | 12:14      | 00:14         |
| 13           | 2008 | 23:20         | 23:28           | 00:13         | 00:18      | 00:08         |
| 14           | 2008 | 18:24         | 18:35           | 19:00         | 19:15      | 00:11         |
| 15           | 2008 | 17:24         | 17:35           | 18:17         | 18:35      | 00:11         |
| 16           | 2008 | 18:44         | 18:58           | 19:10         | 19:27      | 00:14         |
| 17           | 2008 | 20:23         | 20:30           | 21:00         | 21:10      | 00:07         |
| 18           | 2008 | 14:38         | 14:43           | 15:18         | 15:30      | 00:05         |
| 19           | 2008 | 19:23         | 19:27           | 19:40         | 19:47      | 00:04         |
| 20           | 2008 | 00:12         | 00:25           | 01:43         | 01:55      | 00:13         |
| 21           | 2008 | 09:26         | 09:30           | 10:10         | 10:20      | 00:04         |
| 22           | 2008 | 19:09         | 19:15           | 19:40         | 19:48      | 00:06         |
| 23           | 2008 | 01:17         | 01:28           | 02:00         | 02:15      | 00:11         |
| 24           | 2008 | 02:27         | 02:37           | 03:07         | 03:22      | 00:10         |
| 25           | 2008 | 01:59         | 02:25           | 03:45         | 03:49      | 00:26         |
| 26           | 2008 | 12:38         | 12:43           | 13:25         | 13:30      | 00:05         |
| 27           | 2008 | 14:57         | 15:02           | 15:50         | 16:00      | 00:05         |
| 28           | 2009 | 22:45         | 22:50           | 23:10         | 23:25      | 00:05         |
| 29           | 2009 | 04:57         | 05:13           | 05:36         | 05:50      | 00:16         |
| 30           | 2009 | 08:43         | 08:54           | 09:20         | 09:29      | 00:11         |
| 31           | 2009 | 02:09         | 02:15           | 03:25         | 03:35      | 00:06         |
| 32           | 2009 | 21:05         | 21:25           | 21:30         | 21:40      | 00:20         |
| 33           | 2009 | 18:33         | 18:40           | 19:55         | 20:10      | 00:07         |
| 34           | 2009 | 13:47         | 13:57           | 14:25         | 14:35      | 00:10         |
| 35           | 2009 | 12:35         | 12:42           | 12:55         | 13:05      | 00:07         |
| 36           | 2009 | 16:21         | 16:23           | 16:44         | 16:47      | 00:02         |
| 37           | 2009 | 16:49         | 16:50           | 17:10         | 17:20      | 00:01         |
| 38           | 2009 | 00:44         | 00:54           | 01:20         | 01:35      | 00:10         |
| 39           | 2009 | 01:47         | 01:53           | 02:06         | 02:16      | 00:06         |
| 40           | 2009 | 04:24         | 04:30           | 05:45         | 05:55      | 00:06         |
| 41           | 2009 | 10:32         | 10:45           | 11:26         | 11:41      | 00:13         |
| 42           | 2009 | 10:41         | 10:53           | 11:39         | 11:44      | 00:12         |
| 43           | 2009 | 15:37         | 15:43           | 16:00         | 16:01      | 00:06         |

|    |      |       |       |       |       |       |
|----|------|-------|-------|-------|-------|-------|
| 44 | 2009 | 00:16 | 00:23 | 01:06 | 01:10 | 00:07 |
| 45 | 2009 | 01:42 | 01:50 | 02:20 | 02:25 | 00:08 |
| 46 | 2009 | 08:55 | 09:07 | 09:46 | 10:02 | 00:12 |
| 47 | 2009 | 08:23 | 08:35 | 09:15 | 09:33 | 00:12 |
| 48 | 2009 | 18:11 | 18:20 | 18:30 | 18:40 | 00:09 |
| 49 | 2009 | 23:49 | 23:55 | 01:08 | 01:18 | 00:06 |
| 50 | 2009 | 12:48 | 13:03 | 13:23 | 13:40 | 00:15 |
| 51 | 2009 | 05:00 | 05:12 | 05:38 | 05:52 | 00:12 |
| 52 | 2009 | 21:39 | 21:45 | 22:30 | 22:40 | 00:06 |
| 53 | 2009 | 23:09 | 23:14 | 23:50 | 23:57 | 00:05 |
| 54 | 2009 | 19:12 | 19:20 | 19:40 | 19:45 | 00:08 |
| 55 | 2009 | 16:11 | 16:25 | 16:45 | 17:00 | 00:14 |
| 56 | 2009 | 17:47 | 17:55 | 18:18 | 18:27 | 00:08 |
| 57 | 2009 | 01:19 | 01:30 | 02:00 | 02:15 | 00:11 |
| 58 | 2009 | 20:13 | 20:16 | 20:50 | 20:55 | 00:03 |
| 59 | 2009 | 11:41 | 11:46 | 12:10 | 12:15 | 00:05 |
| 60 | 2009 | 11:18 | 11:26 | 11:37 | 11:44 | 00:08 |
| 61 | 2009 | 21:08 | 21:10 | 21:30 | 21:40 | 00:02 |
| 62 | 2010 | 09:50 | 10:02 | 10:27 | 10:40 | 00:12 |
| 63 | 2010 | 22:01 | 22:03 | 22:50 | 22:55 | 00:02 |
| 64 | 2010 | 08:31 | 08:38 | 09:24 | 09:39 | 00:07 |
| 65 | 2010 | 19:15 | 19:30 | 19:55 | 20:05 | 00:15 |
| 66 | 2010 | 07:24 | 07:27 | 08:02 | 08:07 | 00:03 |
| 67 | 2010 | 08:44 | 08:47 | 08:59 | 09:02 | 00:03 |
| 68 | 2010 | 20:23 | 21:00 | 21:25 | 21:26 | 00:37 |
| 69 | 2010 | 14:45 | 14:54 | 15:27 | 15:31 | 00:09 |
| 70 | 2010 | 15:23 | 15:35 | 15:45 | 16:00 | 00:12 |
| 71 | 2010 | 10:37 | 10:44 | 11:05 | 11:15 | 00:07 |
| 72 | 2010 | 07:16 | 07:20 | 07:56 | 08:04 | 00:04 |
| 73 | 2010 | 03:25 | 03:35 | 04:17 | 04:32 | 00:10 |
| 74 | 2010 | 16:48 | 16:53 | 17:36 | 17:43 | 00:05 |
| 75 | 2010 | 08:22 | 08:27 | 09:00 | 09:07 | 00:05 |
| 76 | 2010 | 21:30 | 21:45 | 22:05 | 22:20 | 00:15 |
| 77 | 2010 | 11:46 | 11:55 | 12:20 | 12:30 | 00:09 |
| 78 | 2010 | 21:06 | 21:15 | 21:45 | 22:00 | 00:09 |
| 79 | 2010 | 12:02 | 12:11 | 12:34 | 12:38 | 00:09 |
| 80 | 2010 | 15:57 | 16:00 | 16:20 | 16:25 | 00:03 |
| 81 | 2010 | 04:12 | 04:18 | 04:48 | 05:08 | 00:06 |
| 82 | 2010 | 21:52 | 21:54 | 22:30 | 22:33 | 00:02 |
| 83 | 2010 | 18:44 | 18:53 | 19:15 | 19:20 | 00:09 |
| 84 | 2010 | 15:28 | 15:40 | 16:10 | 16:16 | 00:12 |
| 85 | 2010 | 09:47 | 09:55 | 10:25 | 10:40 | 00:08 |
| 86 | 2010 | 17:34 | 17:38 | 18:30 | 18:35 | 00:04 |
| 87 | 2010 | 12:51 | 12:55 | 13:53 | 14:00 | 00:04 |

|     |         |          |       |       |       |       |
|-----|---------|----------|-------|-------|-------|-------|
| 88  | 2010    | 17:17    | 17:30 | 17:50 | 18:10 | 00:13 |
| 89  | 2010    | 14:41    | 14:53 | 15:20 | 15:30 | 00:12 |
| 90  | 2010    | 14:00    | 14:09 | 14:31 | 14:48 | 00:09 |
| 91  | 2010    | 09:41    | 09:44 | 09:54 | 10:04 | 00:03 |
| 92  | 2010    | 13:25    | 13:32 | 14:05 | 14:20 | 00:07 |
| 93  | 2010    | 18:27    | 18:32 | 18:55 | 19:02 | 00:05 |
| 94  | 2011    | 11:00    | 11:15 | 11:47 | 11:56 | 00:15 |
| 95  | 2011    | 09:44    | 09:52 | 10:16 | 10:25 | 00:08 |
| 96  | 2011 DM |          | DM    | DM    | DM    | DM    |
| 97  | 2011    | 14:28    | 14:38 | 14:58 | 15:05 | 00:10 |
| 98  | 2011    | 06:00    | 06:12 | 06:32 | 06:39 | 00:12 |
| 99  | 2011    | 01:25    | 01:31 | 01:56 | 02:05 | 00:06 |
| 100 | 2011    | 17:37    | 17:38 | 18:00 | 18:04 | 00:01 |
| 101 | 2011    | 09:59    | 10:04 | 10:31 | 10:34 | 00:05 |
| 102 | 2011    | 23:35    | 23:50 | 00:05 | 00:33 | 00:15 |
| 103 | 2011    | 12:13    | 12:20 | 12:34 | 12:37 | 00:07 |
| 104 | 2011    | 10:54    | 11:04 | 11:15 | 11:25 | 00:10 |
| 105 | 2011    | 16:44    | 16:55 | 17:07 | 17:25 | 00:11 |
| 106 | 2011    | 19:20    | 19:23 | 19:50 | 19:58 | 00:03 |
| 107 | 2011    | 12:38    | 12:46 | 13:13 | 13:18 | 00:08 |
| 108 | 2011    | 01:22    | 01:28 | 01:42 | 01:55 | 00:06 |
| 109 | 2011    | 23:55    | 23:59 | 00:40 | 00:47 | 00:04 |
| 110 | 2011    | 14:07    | 14:15 | 14:35 | 14:45 | 00:08 |
| 111 | 2011    | 16:38    | 16:41 | 16:55 | 17:01 | 00:03 |
| 112 | 2011    | 15:16    | 15:27 | 16:06 | 16:25 | 00:11 |
| 113 | 2011    | 13:24 DM |       | DM    | DM    | DM    |
| 114 | 2011    | 21:17    | 21:28 | 21:57 | 22:13 | 00:11 |
| 115 | 2011    | 10:55    | 10:58 | 11:24 | 11:27 | 00:03 |
| 116 | 2011    | 10:05    | 10:12 | 10:45 | 10:52 | 00:07 |
| 117 | 2011    | 14:39    | 14:45 | 15:15 | 15:20 | 00:06 |
| 118 | 2011    | 12:11    | 12:12 | 12:52 | 12:55 | 00:01 |
| 119 | 2011    | 15:22    | 15:35 | 15:47 | 15:57 | 00:13 |
| 120 | 2011    | 09:16    | 09:26 | 09:55 | 10:06 | 00:10 |
| 121 | 2011    | 10:18    | 10:26 | 11:10 | 11:26 | 00:08 |
| 122 | 2011    | 17:15    | 17:18 | 17:26 | 17:59 | 00:03 |
| 123 | 2011    | 11:50    | 12:00 | 12:10 | 12:20 | 00:10 |
| 124 | 2011    | 15:38    | 15:50 | 16:25 | 16:45 | 00:12 |
| 125 | 2012    | 10:26    | 10:33 | 10:48 | 10:56 | 00:07 |
| 126 | 2012    | 13:01    | 13:07 | 13:50 | 13:55 | 00:06 |
| 127 | 2012    | 10:00    | 10:04 | 10:37 | 10:45 | 00:04 |
| 128 | 2012    | 10:07    | 10:15 | 10:35 | 10:45 | 00:08 |
| 129 | 2012    | 12:48    | 12:53 | 13:15 | 13:19 | 00:05 |
| 130 | 2012    | 16:52    | 16:55 | 17:14 | 17:19 | 00:03 |
| 131 | 2012    | 16:54    | 16:58 | 17:50 | 17:56 | 00:04 |

|     |      |       |       |       |       |       |
|-----|------|-------|-------|-------|-------|-------|
| 132 | 2012 | 14:33 | 14:45 | 15:00 | 15:11 | 00:12 |
| 133 | 2012 | 16:34 | 16:38 | 17:10 | 17:18 | 00:04 |
| 134 | 2012 | 13:46 | 13:50 | 14:15 | 14:22 | 00:04 |
| 135 | 2012 | 12:25 | 12:30 | 12:40 | 12:45 | 00:05 |
| 136 | 2012 | 01:42 | 01:46 | 02:10 | 02:22 | 00:04 |
| 137 | 2012 | 09:20 | 09:29 | 10:09 | 10:14 | 00:09 |
| 138 | 2012 | 22:33 | 22:37 | 23:17 | 23:28 | 00:04 |
| 139 | 2012 | 12:29 | 12:35 | 13:08 | 13:15 | 00:06 |
| 140 | 2012 | 13:49 | 14:00 | 14:40 | 15:00 | 00:11 |
| 141 | 2012 | 22:07 | 22:10 | 22:35 | 22:50 | 00:03 |
| 142 | 2012 | 18:08 | 18:15 | 18:35 | 18:41 | 00:07 |
| 143 | 2012 | 15:02 | 15:09 | 15:40 | 15:50 | 00:07 |
| 144 | 2012 | 11:30 | 11:40 | 12:23 | 12:35 | 00:10 |
| 145 | 2012 | 11:05 | 11:15 | 11:50 | 12:00 | 00:10 |
| 146 | 2012 | 19:34 | 19:38 | 19:56 | 20:03 | 00:04 |
| 147 | 2012 | 06:56 | 07:01 | 08:02 | 08:10 | 00:05 |
| 148 | 2012 | 12:42 | 12:48 | 13:08 | 13:15 | 00:06 |
| 149 | 2012 | 11:21 | 11:26 | 11:55 | 12:04 | 00:05 |
| 150 | 2012 | 17:34 | 17:40 | 18:45 | 18:55 | 00:06 |
| 151 | 2012 | 11:07 | 11:10 | 11:25 | 11:30 | 00:03 |
| 152 | 2012 | 09:29 | 09:32 | 10:13 | 10:18 | 00:03 |
| 153 | 2012 | 07:19 | 07:25 | 07:50 | 07:57 | 00:06 |
| 154 | 2012 | 21:02 | 21:06 | 21:35 | 21:46 | 00:04 |
| 155 | 2012 | 17:38 | 17:46 | 17:55 | 18:04 | 00:08 |
| 156 | 2012 | 14:23 | 14:35 | 14:50 | 15:20 | 00:12 |
| 157 | 2012 | 14:44 | 14:58 | 15:13 | 15:30 | 00:14 |
| 158 | 2012 | 23:33 | 23:40 | 01:00 | 01:10 | 00:07 |
| 159 | 2012 | 03:58 | 04:00 | 04:17 | 04:25 | 00:02 |
| 160 | 2012 | 16:25 | 16:29 | 17:04 | 17:10 | 00:04 |
| 161 | 2012 | 07:44 | 07:48 | 08:04 | 08:11 | 00:04 |

| Time at opera | Time to hospit | NACA Score | Heart rate pre | SBP pre-hospit | DBP pre-hospit | SpO2 pre-hosp |
|---------------|----------------|------------|----------------|----------------|----------------|---------------|
| 01:01         | 00:06          | 6          | 105            | 90             | 60             | 87            |
| 00:22         | 00:05 DM       |            | 90             | 100            | 60             | 9999          |
| 00:20         | 00:17          | 6          | 88             | 180            | 157            | 83            |
| 00:27         | 00:05          | 7          | 9999           | 9999           | 9999           | 9999          |
| 00:09         | 00:05          | 5          | 65             | 150            | 110            | 84            |
| 00:40         | 00:10          | 6          | 104            | 78             | 38             | 87            |
| 00:15         | 00:05          | 7          | 9999           | 9999           | 9999           | 9999          |
| 00:13         | 00:14          | 3          | 79             | 113            | 84             | 80            |
| 00:24         | 00:10          | 5          | 98             | 98             | 56             | 83            |
| 00:07         | 00:13          | 3          | 60             | 170            | 110            | 99            |
| 00:14         | 00:05          | 7          | 9999           | 9999           | 9999           | 9999          |
| 00:23         | 00:19          | 6          | 38             | 135            | 85             | 84            |
| 00:45         | 00:05          | 7          | 9999           | 9999           | 9999           | 9999          |
| 00:25         | 00:15          | 7          | 135            | 105            | 68             | 85            |
| 00:42         | 00:18          | 7          | 42             | 9999           | 9999           | 9999          |
| 00:12         | 00:17          | 3          | 140            | 100            | 55             | 84            |
| 00:30         | 00:10          | 7          | 9999           | 9999           | 9999           | 9999          |
| 00:35         | 00:12          | 6          | 9999           | 9999           | 9999           | 9999          |
| 00:13         | 00:07          | 7          | 9999           | 9999           | 9999           | 9999          |
| 01:18         | 00:12          | 6          | 9999           | 9999           | 9999           | 9999          |
| 00:40         | 00:10          | 5          | 92             | 109            | 82             | 86            |
| 00:25         | 00:08          | 6          | 9999           | 9999           | 9999           | 9999          |
| 00:32         | 00:15          | 4          | 82             | 91             | 73             | 93            |
| 00:30         | 00:15          | 5          | 75             | 9999           | 9999           | 99            |
| 01:20         | 00:04          | 6          | 9999           | 9999           | 9999           | 9999          |
| 00:42         | 00:05          | 6          | 9999           | 9999           | 9999           | 9999          |
| 00:48         | 00:10          | 6          | 11             | 125            | 65             | 69            |
| 00:20         | 00:15          | 6          | 9999           | 9999           | 9999           | 9999          |
| 00:23         | 00:14          | 5          | 80             | 160            | 67             | 100           |
| 00:26         | 00:09          | 4          | 42             | 103            | 85             | 92            |
| 01:10         | 00:10          | 6          | 9999           | 9999           | 9999           | 9999          |
| 00:05         | 00:10          | 3          | 95             | 120            | 75             | 98            |
| 01:15         | 00:15          | 6          | 56             | 9999           | 9999           | 97            |
| 00:28         | 00:10          | 7          | 9999           | 9999           | 9999           | 9999          |
| 00:13         | 00:10          | 7          | 9999           | 9999           | 9999           | 9999          |
| 00:21         | 00:03          | 7          | 9999           | 9999           | 9999           | 9999          |
| 00:20         | 00:10          | 5          | 125            | 118            | 95             | 9999          |
| 00:26         | 00:15          | 5          | 65             | 80             | 60             | 94            |
| 00:13         | 00:10          | 6          | 9999           | 9999           | 9999           | 9999          |
| 01:15         | 00:10          | 6          | 40             | 150            | 115            | 9999          |
| 00:41         | 00:15          | 6          | 9999           | 9999           | 9999           | 9999          |
| 00:46         | 00:05          | 5          | 120            | 125            | 95             | 9999          |
| 00:17         | 00:01          | 7          | 9999           | 9999           | 9999           | 9999          |

|       |          |   |      |      |      |      |
|-------|----------|---|------|------|------|------|
| 00:43 | 00:04    | 6 | 9999 | 9999 | 9999 | 9999 |
| 00:30 | 00:05    | 4 | 85   | 220  | 130  | 93   |
| 00:39 | 00:16    | 6 | 9999 | 9999 | 9999 | 9999 |
| 00:40 | 00:18    | 5 | 65   | 99   | 65   | 96   |
| 00:10 | 00:10    | 7 | 9999 | 9999 | 9999 | 9999 |
| 01:13 | 00:10    | 7 | 9999 | 9999 | 9999 | 9999 |
| 00:20 | 00:17    | 7 | 45   | 115  | 75   | 90   |
| 00:26 | 00:14    | 7 | 140  | 9999 | 9999 | 9999 |
| 00:45 | 00:10    | 7 | 9999 | 9999 | 9999 | 9999 |
| 00:36 | 00:07    | 6 | 104  | 9999 | 9999 | 9999 |
| 00:20 | 00:05    | 5 | 97   | 204  | 109  | 100  |
| 00:20 | 00:15    | 6 | 9999 | 9999 | 9999 | 9999 |
| 00:23 | 00:09    | 6 | 9999 | 9999 | 9999 | 9999 |
| 00:30 | 00:15    | 7 | 9999 | 9999 | 9999 | 9999 |
| 00:34 | 00:05    | 7 | 9999 | 9999 | 9999 | 9999 |
| 00:24 | 00:05    | 7 | 9999 | 9999 | 9999 | 9999 |
| 00:11 | 00:07    | 6 | 9999 | 9999 | 9999 | 9999 |
| 00:20 | 00:10    | 7 | 9999 | 9999 | 9999 | 9999 |
| 00:25 | 00:13    | 7 | 9999 | 9999 | 9999 | 9999 |
| 00:47 | 00:05    | 6 | 9999 | 9999 | 9999 | 9999 |
| 00:46 | 00:15    | 7 | 47   | 50   | 30   | 81   |
| 00:25 | 00:10    | 6 | 9999 | 9999 | 9999 | 9999 |
| 00:35 | 00:05    | 5 | 48   | 222  | 80   | 99   |
| 00:12 | 00:03    | 7 | 9999 | 9999 | 9999 | 9999 |
| 00:25 | 00:01    | 5 | 95   | 175  | 95   | 92   |
| 00:33 | 00:04    | 6 | 32   | 130  | 55   | 9999 |
| 00:10 | 00:15    | 4 | 90   | 110  | 80   | 98   |
| 00:21 | 00:10    | 5 | 95   | 105  | 85   | 100  |
| 00:36 | 00:08    | 7 | 9999 | 9999 | 9999 | 9999 |
| 00:42 | 00:15    | 6 | 9999 | 9999 | 9999 | 9999 |
| 00:43 | 00:07    | 6 | 9999 | 9999 | 9999 | 9999 |
| 00:33 | 00:07 DM |   | 84   | 136  | 109  | 92   |
| 00:20 | 00:15    | 6 | 9999 | 9999 | 9999 | 9999 |
| 00:25 | 00:10    | 7 | 9999 | 9999 | 9999 | 9999 |
| 00:30 | 00:15    | 7 | 9999 | 9999 | 9999 | 9999 |
| 00:23 | 00:04    | 7 | 9999 | 9999 | 9999 | 9999 |
| 00:20 | 00:05    | 7 | 9999 | 9999 | 9999 | 9999 |
| 00:30 | 00:20    | 5 | 85   | 185  | 100  | 99   |
| 00:36 | 00:03    | 6 | 9999 | 9999 | 9999 | 9999 |
| 00:22 | 00:05    | 5 | 83   | 103  | 72   | 84   |
| 00:30 | 00:06    | 6 | 9999 | 9999 | 9999 | 9999 |
| 00:30 | 00:15    | 7 | 9999 | 9999 | 9999 | 9999 |
| 00:52 | 00:05    | 7 | 9999 | 9999 | 9999 | 9999 |
| 00:58 | 00:07    | 6 | 9999 | 9999 | 9999 | 9999 |

|    |       |       |   |      |      |      |      |
|----|-------|-------|---|------|------|------|------|
|    | 00:20 | 00:20 | 3 | 95   | 125  | 72   | 9999 |
|    | 00:27 | 00:10 | 6 | 9999 | 9999 | 9999 | 9999 |
|    | 00:22 | 00:17 | 7 | 9999 | 9999 | 9999 | 9999 |
|    | 00:10 | 00:10 | 7 | 130  | 115  | 65   | 68   |
|    | 00:33 | 00:15 | 7 | 9999 | 9999 | 9999 | 9999 |
|    | 00:23 | 00:07 | 6 | 9999 | 9999 | 9999 | 9999 |
|    | 00:32 | 00:09 | 4 | 102  | 125  | 105  | 77   |
|    | 00:24 | 00:09 | 7 | 9999 | 9999 | 9999 | 9999 |
| DM |       | DM    | 4 | 120  | DM   | DM   | 90   |
|    | 00:20 | 00:07 | 6 | 9999 | 9999 | 9999 | 9999 |
|    | 00:20 | 00:07 | 5 | 95   | 115  | 80   | 9999 |
|    | 00:25 | 00:09 | 6 | 44   | 9999 | 9999 | 68   |
|    | 00:22 | 00:04 | 6 | 9999 | 9999 | 9999 | 9999 |
|    | 00:27 | 00:03 | 6 | 9999 | 9999 | 9999 | 9999 |
|    | 00:15 | 00:28 | 7 | 110  | 75   | 50   | 80   |
|    | 00:14 | 00:03 | 3 | DM   | DM   | DM   | DM   |
|    | 00:11 | 00:10 | 7 | 9999 | 9999 | 9999 | 9999 |
|    | 00:12 | 00:18 | 5 | 90   | 130  | 70   | 98   |
|    | 00:27 | 00:08 | 6 | 9999 | 9999 | 9999 | 9999 |
|    | 00:27 | 00:05 | 5 | 58   | 120  | 103  | 50   |
|    | 00:14 | 00:13 | 3 | 72   | 130  | 85   | 91   |
|    | 00:41 | 00:07 | 5 | 110  | 105  | 60   | 97   |
|    | 00:20 | 00:10 | 3 | 75   | 140  | 80   | 97   |
|    | 00:14 | 00:06 | 5 | 125  | 204  | 120  | 97   |
|    | 00:39 | 00:19 | 7 | 9999 | 9999 | 9999 | 9999 |
| DM |       | DM    | 5 | 110  | 110  | 80   | 84   |
|    | 00:29 | 00:16 | 6 | 9999 | 9999 | 9999 | 9999 |
|    | 00:26 | 00:03 | 5 | 93   | 77   | 40   | 97   |
|    | 00:33 | 00:07 | 7 | 9999 | 9999 | 9999 | 9999 |
|    | 00:30 | 00:05 | 7 | 9999 | 9999 | 9999 | 9999 |
|    | 00:40 | 00:03 | 6 | 9999 | 9999 | 9999 | 9999 |
|    | 00:12 | 00:10 | 7 | 9999 | 9999 | 9999 | 9999 |
|    | 00:29 | 00:11 | 7 | 9999 | 9999 | 9999 | 9999 |
|    | 00:44 | 00:16 | 6 | 99   | 90   | 60   | 60   |
|    | 00:08 | 00:33 | 7 | 9999 | 9999 | 9999 | 9999 |
|    | 00:10 | 00:10 | 5 | 9999 | 9999 | 9999 | 9999 |
|    | 00:35 | 00:20 | 5 | 89   | 115  | 40   | 95   |
|    | 00:15 | 00:08 | 6 | 9999 | 9999 | 9999 | 9999 |
|    | 00:43 | 00:05 | 7 | 9999 | 9999 | 9999 | 9999 |
|    | 00:33 | 00:08 | 6 | 9999 | 9999 | 9999 | 9999 |
|    | 00:20 | 00:10 | 6 | 70   | 90   | 70   | 94   |
|    | 00:22 | 00:04 | 6 | 9999 | 9999 | 9999 | 9999 |
|    | 00:19 | 00:05 | 7 | 9999 | 9999 | 9999 | 9999 |
|    | 00:52 | 00:06 | 6 | 9999 | 9999 | 9999 | 9999 |

|       |       |   |      |      |        |      |
|-------|-------|---|------|------|--------|------|
| 00:15 | 00:11 | 7 | 9999 | 9999 | 9999   | 9999 |
| 00:32 | 00:08 | 6 | 9999 | 9999 | 9999   | 9999 |
| 00:25 | 00:07 | 7 | 9999 | 9999 | 9999   | 9999 |
| 00:10 | 00:05 | 5 | 90   | 120  | 80     | 98   |
| 00:24 | 00:12 | 4 | 115  | 120  | 98     | 89   |
| 00:40 | 00:05 | 7 | 130  | 133  | 100 DM |      |
| 00:40 | 00:11 | 6 | 9999 | 9999 | 9999   | 9999 |
| 00:33 | 00:07 | 5 | 119  | 131  | 83     | 70   |
| 00:40 | 00:20 | 6 | 9999 | 9999 | 9999   | 9999 |
| 00:25 | 00:15 | 7 | 9999 | 9999 | 9999   | 9999 |
| 00:20 | 00:06 | 7 | 73   | 147  | 126    | 73   |
| 00:31 | 00:10 | 6 | 124  | 108  | 65     | 80   |
| 00:43 | 00:12 | 7 | 9999 | 9999 | 9999   | 9999 |
| 00:35 | 00:10 | 4 | 95   | 85   | 55     | 93   |
| 00:18 | 00:07 | 6 | 9999 | 9999 | 9999   | 9999 |
| 01:01 | 00:08 | 7 | 9999 | 9999 | 9999   | 9999 |
| 00:20 | 00:07 | 7 | 9999 | 9999 | 9999   | 9999 |
| 00:29 | 00:09 | 7 | 9999 | 9999 | 9999   | 9999 |
| 01:05 | 00:10 | 6 | 9999 | 9999 | 9999   | 9999 |
| 00:15 | 00:05 | 7 | 9999 | 9999 | 9999   | 9999 |
| 00:41 | 00:05 | 6 | 9999 | 9999 | 9999   | 9999 |
| 00:25 | 00:07 | 7 | 9999 | 9999 | 9999   | 9999 |
| 00:29 | 00:11 | 7 | 9999 | 9999 | 9999   | 9999 |
| 00:09 | 00:09 | 7 | 9999 | 9999 | 9999   | 9999 |
| 00:15 | 00:30 | 7 | 9999 | 9999 | 9999   | 9999 |
| 00:15 | 00:17 | 7 | 9999 | 9999 | 9999   | 9999 |
| 01:20 | 00:10 | 3 | 70   | 95   | 60     | 9999 |
| 00:17 | 00:08 | 5 | 115  | 150  | 100    | 98   |
| 00:35 | 00:06 | 7 | 9999 | 9999 | 9999   | 9999 |
| 00:16 | 00:07 | 6 | 9999 | 9999 | 9999   | 9999 |



| GCS pre-hospit | Heart rate ED | SBD ED (mmHg) | DBD ED (mmHg) | SpO2 ED (%) | GCS ED | Attendance er |
|----------------|---------------|---------------|---------------|-------------|--------|---------------|
| 3              | 55            | 80            | 40            | 87          |        | 3 yes         |
| 3              | 9999          | 9999          | 9999          | 9999        |        | 3 yes         |
| 15             | 9999          | 9999          | 9999          | 9999        |        | 3 yes         |
| 3              | 9999          | 9999          | 9999          | 9999        |        | 3 yes         |
| 14             | 80            | 40            | 20            | 70          | DM     | yes           |
| 7              | 9999          | 9999          | 9999          | 9999        |        | 3 yes         |
| 3              | 9999          | 9999          | 9999          | 9999        |        | 3 yes         |
| 15             | 135           | 154           | 94            | 69          | DM     | no            |
| 15             | 88            | 115           | 68            | 100         | DM     | yes           |
| 15             | 40            | 166           | 108           | 99          | DM     | no            |
| 3              | 9999          | 9999          | 9999          | 9999        |        | 3 yes         |
| 3              | 9999          | 9999          | 9999          | 9999        |        | 3 yes         |
| 3              | 9999          | 9999          | 9999          | 9999        |        | 3 yes         |
| 14             | 9999          | 9999          | 9999          | 9999        |        | 3 yes         |
| 3              | 9999          | 9999          | 9999          | 9999        |        | 3 yes         |
| 11             | 133           | 195           | 46            | 93          | DM     | no            |
| 3              | 9999          | 9999          | 9999          | 9999        |        | 3 yes         |
| 3              | 9999          | 9999          | 9999          | 9999        |        | 3 yes         |
| 3              | 9999          | 9999          | 9999          | 9999        |        | 3 yes         |
| 3              | 9999          | 9999          | 9999          | 9999        |        | 3 yes         |
| 14             | 100           | 100           | 70            | 100         |        | 3 yes         |
| 3              | 9999          | 9999          | 9999          | 9999        |        | 3 yes         |
| 14             | 97            | 61            | 40            | 84          | DM     | no            |
| 14             | 90            | 90            | 50            | 100         | DM     | yes           |
| 3              | 9999          | 9999          | 9999          | 9999        |        | 3 yes         |
| 3              | 9999          | 9999          | 9999          | 9999        |        | 3 yes         |
| 3              | 9999          | 9999          | 9999          | 9999        |        | 3 yes         |
| 3              | 9999          | 9999          | 9999          | 9999        |        | 3 yes         |
| 10             | 110           | 189           | 93            | 87          |        | 3 no          |
| 14             | 9999          | 9999          | 9999          | 88          |        | 3 no          |
| 3              | 120           | 54            | 38            | 98          |        | 3 yes         |
| 15             | 109           | 184           | 74            | 95          | DM     | no            |
| 15             | 9999          | 9999          | 9999          | 9999        |        | 3 yes         |
| 3              | 9999          | 9999          | 9999          | 9999        |        | 3 yes         |
| 3              | 9999          | 9999          | 9999          | 9999        |        | 3 yes         |
| 3              | 9999          | 9999          | 9999          | 9999        |        | 3 yes         |
| 3              | 40            | 65            | 40            | 93          |        | 3 yes         |
| 15             | 90            | 85            | 65            | 79          |        | 14 yes        |
| 3              | 9999          | 9999          | 9999          | 9999        |        | 3 yes         |
| 3              | 9999          | 9999          | 9999          | 9999        |        | 3 yes         |
| 3              | 9999          | 9999          | 9999          | 9999        |        | 3 yes         |
| 11             | 9999          | 9999          | 9999          | 9999        |        | 3 no          |
| 3              | 9999          | 9999          | 9999          | 9999        |        | 3 yes         |

|       |      |      |        |         |        |
|-------|------|------|--------|---------|--------|
| 3     | 110  | 110  | 45     | 9999    | 3 yes  |
| 15 DM |      | 260  | 120 DM |         | 3 yes  |
| 3     | 120  | 53   | 37     | 9999    | 3 yes  |
| 15    | 140  | 100  | 64     | 9999 DM | yes    |
| 3     | 9999 | 9999 | 9999   | 9999    | 3 yes  |
| 3     | 9999 | 9999 | 9999   | 9999    | 3 yes  |
| 13    | 9999 | 9999 | 9999   | 9999    | 3 yes  |
| 3     | 9999 | 9999 | 9999   | 9999    | 3 no   |
| 3     | 9999 | 9999 | 9999   | 9999    | 3 yes  |
| 3     | 9999 | 9999 | 9999   | 83      | 3 yes  |
| 6     | 97   | 142  | 74     | 94      | 5 yes  |
| 3     | 9999 | 9999 | 9999   | 9999    | 3 yes  |
| 3     | 9999 | 9999 | 9999   | 9999    | 3 yes  |
| 3     | 9999 | 9999 | 9999   | 9999    | 3 yes  |
| 3     | 9999 | 9999 | 9999   | 9999    | 3 yes  |
| 3     | 9999 | 9999 | 9999   | 9999    | 3 yes  |
| 3     | 9999 | 9999 | 9999   | 9999    | 3 yes  |
| 3     | 9999 | 9999 | 9999   | 9999    | 3 yes  |
| 3     | 9999 | 9999 | 9999   | 9999    | 3 yes  |
| 3     | 9999 | 9999 | 9999   | 9999    | 3 yes  |
| 3     | 9999 | 9999 | 9999   | 9999    | 3 yes  |
| 3     | 9999 | 9999 | 9999   | 9999    | 3 yes  |
| 5     | 9999 | 9999 | 9999   | 9999    | 3 yes  |
| 3     | 9999 | 9999 | 9999   | 9999    | 3 yes  |
| 3     | 96   | 238  | 68     | 99      | 3 yes  |
| 3     | 9999 | 9999 | 9999   | 9999    | 3 yes  |
| 6     | 84   | 196  | 105    | 99      | 3 yes  |
| 3     | 9999 | 9999 | 9999   | 9999    | 3 yes  |
| 14    | 80   | 42   | 25 DM  | DM      | yes    |
| 14    | 75   | 90   | 50     | 94      | 10 yes |
| 3     | 9999 | 9999 | 9999   | 9999    | 3 yes  |
| 3     | 9999 | 9999 | 9999   | 9999    | 3 yes  |
| 3     | 9999 | 9999 | 9999   | 9999    | 3 yes  |
| 9     | 24   | 80   | 60 DM  |         | 3 yes  |
| 3     | 9999 | 9999 | 9999   | 9999    | 3 no   |
| 3     | 9999 | 9999 | 9999   | 9999    | 3 yes  |
| 3     | 9999 | 9999 | 9999   | 9999    | 3 yes  |
| 3     | 9999 | 9999 | 9999   | 9999    | 3 yes  |
| 3     | 9999 | 9999 | 9999   | 9999    | 3 yes  |
| 3     | 100  | 104  | 54     | 99      | 3 yes  |
| 3     | 9999 | 9999 | 9999   | 9999    | 3 yes  |
| 10    | 87   | 155  | 95     | 99      | 9 yes  |
| 3     | 86   | 150  | 90 DM  |         | 3 yes  |
| 3     | 9999 | 9999 | 9999   | 9999    | 3 yes  |
| 3     | 9999 | 9999 | 9999   | 9999    | 3 yes  |
| 3     | 60   | 140  | 121    | 96      | 3 yes  |

|    |       |      |      |       |      |        |
|----|-------|------|------|-------|------|--------|
|    | 14    | 103  | 128  | 84    | 75   | 13 no  |
|    | 3     | 9999 | 9999 | 9999  | 9999 | 3 yes  |
|    | 3     | 9999 | 9999 | 9999  | 9999 | 3 yes  |
|    | 15    | 9999 | 9999 | 9999  | 9999 | 3 yes  |
|    | 3     | 9999 | 9999 | 9999  | 9999 | 3 yes  |
|    | 3     | 9999 | 9999 | 9999  | 9999 | 3 yes  |
|    | 15    | 9999 | 9999 | 9999  | 9999 | 6 no   |
|    | 3     | 9999 | 9999 | 9999  | 9999 | 3 yes  |
| DM |       | 81   | 55   | 28    | 81   | 13 no  |
|    | 3     | 9999 | 9999 | 9999  | 9999 | 3 yes  |
|    | 14    | 100  | 80   | 40    | 9999 | 14 yes |
|    | 3     | 92   | 70   | 38    | 99   | 3 yes  |
|    | 3     | 9999 | 9999 | 9999  | 9999 | 3 yes  |
|    | 3     | 9999 | 9999 | 9999  | 9999 | 3 yes  |
|    | 15    | 9999 | 9999 | 9999  | 9999 | 3 no   |
|    | 13 DM | DM   | DM   | DM    | DM   | no     |
|    | 3     | 9999 | 9999 | 9999  | 9999 | 3 no   |
|    | 5     | 90   | 120  | 70    | 99   | 5 yes  |
|    | 3     | 9999 | 9999 | 9999  | 9999 | 3 no   |
|    | 11    | 92   | 98   | 78    | 9999 | 4 no   |
|    | 15    | 79   | 112  | 77    | 99   | 15 yes |
|    | 3     | 110  | 89   | 71    | 99   | 3 yes  |
|    | 15    | 71   | 197  | 55    | 100  | 15 no  |
|    | 5     | 120  | 133  | 70    | 100  | 3 no   |
|    | 3     | 9999 | 9999 | 9999  | 9999 | 3 yes  |
|    | 15    | 9999 | 9999 | 9999  | 9999 | 3 no   |
|    | 3     | 9999 | 9999 | 9999  | 9999 | 3 yes  |
|    | 15    | 130  | 9999 | 9999  | 9999 | 15 no  |
|    | 3     | 9999 | 9999 | 9999  | 9999 | 3 yes  |
|    | 3     | 9999 | 9999 | 9999  | 9999 | 3 yes  |
|    | 3     | 9999 | 9999 | 9999  | 9999 | 3 no   |
|    | 3     | 9999 | 9999 | 9999  | 9999 | 3 no   |
|    | 3     | 9999 | 9999 | 9999  | 9999 | 3 yes  |
|    | 15    | 9999 | 9999 | 9999  | 9999 | 3 yes  |
|    | 3     | 9999 | 9999 | 9999  | 9999 | 3 no   |
|    | 6     | 125  | 110  | 80    | 88   | 3 yes  |
|    | 6     | 68   | 60   | 40    | 100  | 3 yes  |
|    | 3     | 9999 | 9999 | 9999  | 9999 | 3 no   |
|    | 3     | 9999 | 9999 | 9999  | 9999 | 3 no   |
|    | 3     | 9999 | 9999 | 9999  | 9999 | 3 yes  |
|    | 3     | 80   | 55   | 20 DM |      | 3 no   |
|    | 3     | 63   | 102  | 55    | 99   | 3 yes  |
|    | 3     | 9999 | 9999 | 9999  | 9999 | 3 yes  |
|    | 3 DM  | DM   | DM   | DM    |      | 3 yes  |

|    |      |      |      |      |    |     |
|----|------|------|------|------|----|-----|
| 3  | 9999 | 9999 | 9999 | 9999 | 3  | yes |
| 3  | 9999 | 9999 | 9999 | 9999 | 3  | yes |
| 3  | 9999 | 9999 | 9999 | 9999 | 3  | no  |
| 15 | 93   | 101  | 73   | 98   | 15 | yes |
| 15 | 120  | 80   | 48   | 82   | 15 | no  |
| 15 | 9999 | 9999 | 9999 | 9999 | 3  | no  |
| 15 | 9999 | 9999 | 9999 | 9999 | 3  | yes |
| 14 | 99   | 126  | 99   | 81   | 6  | yes |
| 3  | 80   | 50   | 10   | 75   | 3  | yes |
| 3  | 9999 | 9999 | 9999 | 9999 | 3  | yes |
| 3  | 9999 | 9999 | 9999 | 9999 | 3  | no  |
| 15 | 9999 | 9999 | 9999 | 9999 | 3  | yes |
| 3  | 9999 | 9999 | 9999 | 9999 | 3  | yes |
| 15 | 89   | 140  | 60   | 100  | 15 | no  |
| 3  | 9999 | 9999 | 9999 | 9999 | 3  | yes |
| 3  | 9999 | 9999 | 9999 | 9999 | 3  | yes |
| 3  | 9999 | 9999 | 9999 | 9999 | 3  | yes |
| 3  | 9999 | 9999 | 9999 | 9999 | 3  | yes |
| 3  | 9999 | 9999 | 9999 | 9999 | 3  | yes |
| 3  | 9999 | 9999 | 9999 | 9999 | 3  | yes |
| 3  | 9999 | 60   | 30   | 9999 | 3  | yes |
| 3  | 9999 | 9999 | 9999 | 9999 | 3  | no  |
| 3  | 9999 | 9999 | 9999 | 9999 | 3  | yes |
| 15 | 9999 | 9999 | 9999 | 9999 | 3  | yes |
| 6  | 9999 | 9999 | 9999 | 9999 | 3  | yes |
| 3  | 9999 | 9999 | 9999 | 9999 | 3  | no  |
| 14 | DM   | DM   | DM   | DM   | DM | yes |
| 3  | 117  | 92   | 43   | 99   | 3  | yes |
| 3  | 9999 | 9999 | 9999 | 9999 | 3  | yes |
| 3  | 9999 | 9999 | 9999 | 9999 | 3  | yes |

**CPR by bystander Professional CPR Airway management Method of intubation Spine Management Pharmacological Management**

|     |     |               |               |     |               |                 |
|-----|-----|---------------|---------------|-----|---------------|-----------------|
| no  | yes | intubation    | no reflexes   | no  | Adrenaline, A | Adrenaline, A   |
| yes | yes | intubation    | anaesthesia   | no  | Adrenaline, E | -               |
| no  | yes | intubation    | DM            | no  | Aziclav       | unspecified C   |
| no  | yes | intubation    | no reflexes   | no  | Adrenaline, A | -               |
| no  | no  | intubation    | anaesthesia   | no  | Etomidate, F  | Adrenaline      |
| no  | yes | intubation    | anaesthesia   | no  | Etomidate, F  | Adrenaline, A   |
| no  | yes | intubation    | no reflexes   | no  | Adrenaline    | -               |
| no  | no  | oxygen face r | -             | no  | -             | Lasix, Cepime   |
| no  | no  | no            | -             | no  | Isoket Spray, | Plavix, Lique   |
| no  | no  | no            | -             | no  | Methylpredni  | Rivotril, Solut |
| yes | yes | intubation    | no reflexes   | no  | Adrenaline    | -               |
| no  | yes | intubation    | no reflexes   | no  | Adrenaline    | Adrenaline      |
| yes | yes | intubation    | no reflexes   | no  | Atropine, Adr | unspecified C   |
| no  | yes | intubation    | no reflexes   | no  | Atropine, Adr | Adrenaline, A   |
| yes | yes | DM            | -             | no  | Atropine, Adr | -               |
| no  | no  | oxygen face r | -             | no  | -             | Beloc, Lasix, I |
| no  | yes | intubation    | no reflexes   | no  | Adrenaline    | -               |
| yes | yes | intubation    | anaesthesia   | no  | Adrenaline, C | -               |
| yes | yes | intubation    | no reflexes   | no  | Adrenaline, A | -               |
| no  | yes | intubation    | no reflexes   | no  | Adrenaline, A | -               |
| no  | no  | intubation    | DM            | no  | -             | -               |
| yes | yes | intubation    | no reflexes   | yes | Adrenaline, A | -               |
| no  | yes | oxygen face r | -             | no  | Ephedrin, Na  | Adrenaline, A   |
| no  | no  | oxygen face r | -             | no  | -             | Morphine        |
| no  | yes | intubation    | no reflexes   | no  | Adrenaline, A | -               |
| no  | yes | intubation    | anaesthesia   | no  | Adrenaline, A | -               |
| no  | yes | intubation    | no reflexes   | yes | Adrenaline, A | -               |
| yes | yes | intubation    | anaesthesia ( | no  | Adrenaline, A | Cordaron, Ad    |
| no  | no  | intubation    | DM            | no  | Torecan       | -               |
| no  | yes | intubation    | DM            | no  | -             | unspecified C   |
| no  | yes | intubation    | no reflexes   | no  | Adrenaline, A | Adrenaline, N   |
| no  | no  | oxygen face r | -             | no  | -             | -               |
| no  | yes | intubation    | anaesthesia   | no  | Adrenaline, A | -               |
| yes | yes | intubation    | no reflexes   | no  | Adrenaline, C | -               |
| yes | yes | no            | -             | no  | Adrenaline, A | -               |
| no  | yes | intubation    | no reflexes   | no  | Adrenaline, A | -               |
| no  | yes | intubation    | anaesthesia   | yes | Adrenaline, N | Adrenaline      |
| no  | no  | no            | -             | no  | Adrenaline, E | -               |
| no  | yes | intubation    | no reflexes   | yes | Adrenaline    | Catecholamir    |
| no  | yes | intubation    | no reflexes   | no  | Adrenaline, V | unspecified C   |
| no  | yes | intubation    | no reflexes   | no  | Adrenaline, A | -               |
| no  | yes | intubation    | no reflexes   | yes | -             | Adrenaline, A   |
| no  | yes | intubation    | no reflexes   | no  | Magnesium, I  | -               |

|     |     |                |             |     |                              |
|-----|-----|----------------|-------------|-----|------------------------------|
| no  | yes | intubation     | no reflexes | no  | Adrenaline, A Sandostatin, I |
| no  | no  | no             | -           | no  | - -                          |
| no  | yes | intubation     | no reflexes | no  | Adrenaline, A Adrenaline, A  |
| no  | yes | oxygen face r- |             | no  | Nitro, Aspegic Adrenaline, C |
| yes | yes | bag-valve-ma-  |             | no  | Adrenaline, A Adrenaline     |
| yes | yes | intubation     | no reflexes | no  | Adrenaline, A-               |
| no  | yes | bag-valve-ma-  |             | no  | Adrenaline Adrenaline        |
| no  | yes | intubation     | no reflexes | no  | Adrenaline, A-               |
| yes | yes | intubation     | no reflexes | no  | Adrenaline, A Adrenaline, A  |
| no  | yes | intubation     | no reflexes | yes | Adrenaline, A Adrenaline, A  |
| no  | no  | intubation     | DM          | no  | - -                          |
| no  | yes | intubation     | no reflexes | no  | Adrenaline, A Adrenaline, N  |
| yes | yes | intubation     | no reflexes | no  | Phenylephrin Adrenaline      |
| no  | yes | intubation     | no reflexes | no  | Adrenaline, A-               |
| yes | yes | intubation     | no reflexes | yes | Adrenaline, A-               |
| yes | yes | intubation     | no reflexes | no  | Adrenaline, A-               |
| yes | yes | intubation     | no reflexes | no  | Adrenaline, A Adrenaline, E  |
| no  | yes | intubation     | no reflexes | no  | Adrenaline, C-               |
| no  | yes | intubation     | no reflexes | no  | Adrenaline, A-               |
| no  | yes | intubation     | no reflexes | no  | Adrenaline Adrenaline, A     |
| no  | yes | intubation     | anaesthesia | no  | Adrenaline, D Adrenaline     |
| no  | yes | intubation     | no reflexes | no  | Adrenaline, Atropine         |
| no  | no  | intubation     | anaesthesia | no  | Ethomidate, I-               |
| yes | yes | intubation     | no reflexes | no  | Adrenaline Adrenaline        |
| no  | no  | no             | -           | no  | - NaCL                       |
| no  | yes | intubation     | no reflexes | no  | Adrenaline, A Catecholamir   |
| no  | yes | no             | -           | no  | - Adrenaline                 |
| no  | no  | oxygen face r- |             | yes | NaCl, Ketami Volume, FFP,    |
| no  | yes | intubation     | no reflexes | no  | Adrenaline, A-               |
| no  | yes | intubation     | no reflexes | no  | Adrenaline, A Vasopressin, . |
| no  | yes | intubation     | no reflexes | no  | Adrenaline, A Adrenaline, T  |
| no  | yes | bag-valve-ma-  |             | no  | - Adrenaline, A              |
| no  | yes | intubation     | no reflexes | no  | Adrenaline, A Adrenaline, A  |
| yes | yes | intubation     | no reflexes | no  | Adrenaline, A-               |
| yes | yes | intubation     | no reflexes | no  | Adrenaline, A Adrenaline     |
| yes | yes | intubation     | no reflexes | no  | Adrenaline, A Adrenaline     |
| yes | yes | intubation     | no reflexes | no  | Adrenaline, A Adrenaline     |
| no  | no  | intubation     | anaesthesia | no  | Temesta Dormicum, Fe         |
| yes | yes | intubation     | no reflexes | no  | Adrenaline, A Adrenaline     |
| no  | no  | no             | -           | no  | Voluven, NaC-                |
| no  | yes | intubation     | no reflexes | no  | Adrenaline, A Liquemin, Pla  |
| yes | yes | no             | no reflexes | no  | Adrenaline, A-               |
| no  | yes | intubation     | no reflexes | no  | Adrenaline, A-               |
| no  | yes | intubation     | no reflexes | no  | Adrenaline, A Catecholamir   |

|     |     |               |             |     |   |                              |
|-----|-----|---------------|-------------|-----|---|------------------------------|
| no  | no  | no            | -           | no  | - | Cefepime, Ko                 |
| yes | yes | intubation    | no reflexes | no  | - | Adrenaline, A-               |
| no  | yes | intubation    | anaesthesia | no  | - | Adrenaline, AAdrenaline      |
| no  | yes | intubation    | no reflexes | no  | - | Adrenaline Adrenaline, A     |
| no  | yes | intubation    | no reflexes | no  | - | Adrenaline, A-               |
| yes | yes | intubation    | no reflexes | no  | - | Adrenaline, CAdrenaline, A   |
| no  | yes | intubation    | no reflexes | no  | - | Dospir, Atrov Adrenaline     |
| yes | yes | intubation    | no reflexes | no  | - | Adrenaline, AAdrenaline      |
| no  | no  | no            | -           | no  | - | Solumedrol, I                |
| yes | yes | intubation    | no reflexes | no  | - | Adrenaline, AAdrenaline      |
| no  | no  | intubation    | DM          | yes | - | EK, FFP, Augn                |
| no  | yes | intubation    | no reflexes | no  | - | Ephedrin -                   |
| yes | yes | intubation    | no reflexes | no  | - | Adrenaline, C-               |
| no  | yes | intubation    | no reflexes | no  | - | Adrenaline, F Atropine, Adr  |
| no  | yes | intubation    | no reflexes | no  | - | Glucose solut Adrenaline, A  |
| no  | no  | no            | -           | no  | - | -                            |
| yes | yes | bag-valve-ma- | -           | no  | - | -                            |
| no  | no  | no            | -           | no  | - | Morphine                     |
| no  | yes | intubation    | no reflexes | no  | - | Adrenaline, C-               |
| no  | no  | no            | -           | no  | - | NaCL, Morph                  |
| no  | yes | no            | -           | no  | - | -                            |
| no  | no  | intubation    | anaesthesia | no  | - | -                            |
| no  | no  | no            | -           | no  | - | Fentanyl, Pri                |
| no  | no  | bag-valve-ma- | -           | no  | - | -                            |
| yes | yes | intubation    | no reflexes | no  | - | Adrenaline, CAdrenaline      |
| no  | yes | bag-valve-ma- | -           | no  | - | Adrenaline                   |
| yes | yes | intubation    | anaesthesia | no  | - | Adrenaline, DAdrenaline      |
| no  | no  | no            | -           | no  | - | -                            |
| yes | yes | intubation    | no reflexes | no  | - | Adrenaline Adrenaline        |
| no  | yes | intubation    | no reflexes | no  | - | Adrenaline -                 |
| yes | yes | intubation    | no reflexes | no  | - | Adrenaline -                 |
| yes | yes | intubation    | no reflexes | no  | - | Adrenaline -                 |
| yes | yes | intubation    | no reflexes | no  | - | Adrenaline, CAdrenaline, A   |
| no  | yes | intubation    | no reflexes | no  | - | Adrenaline Actilyse          |
| yes | yes | intubation    | no reflexes | no  | - | Adrenaline -                 |
| no  | yes | intubation    | anaesthesia | yes | - | Adrenaline, VEK, FFP, TK, A  |
| no  | no  | intubation    | anaesthesia | no  | - | Disoprivan, E: Adrenaline, N |
| no  | yes | bag-valve-ma- | -           | no  | - | Adrenaline                   |
| yes | yes | intubation    | no reflexes | no  | - | Adrenaline -                 |
| no  | yes | intubation    | no reflexes | no  | - | Adrenaline -                 |
| no  | yes | intubation    | no reflexes | no  | - | Adrenaline FFP, EK, Catec    |
| no  | yes | intubation    | no reflexes | no  | - | Adrenaline Naloxon, Flur     |
| no  | yes | intubation    | no reflexes | no  | - | Catecholamir Adrenaline      |
| yes | yes | intubation    | no reflexes | no  | - | Adrenaline Adrenaline        |

|     |     |                |             |     |                |               |
|-----|-----|----------------|-------------|-----|----------------|---------------|
| yes | yes | intubation     | no reflexes | no  | Adrenaline     | Adrenaline    |
| yes | yes | DM             | -           | no  | Adrenaline, A  | Adrenaline    |
| yes | yes | bag-valve-ma-  |             | no  | Adrenaline, A- |               |
| no  | no  | DM             | -           | no  | ASS, Plavix    | Liquemin, Pla |
| no  | yes | intubation     | no reflexes | no  | -              | Catecholamir  |
| no  | yes | intubation     | no reflexes | no  | Adrenaline, A  | Adrenaline, A |
| no  | yes | DM             | -           | no  | Adrenaline     | -             |
| no  | no  | oxygen face r- |             | no  | -              | Morphine      |
| yes | yes | oxygen face r- |             | no  | Adrenaline     | Adrenaline, A |
| yes | yes | intubation     | no reflexes | no  | Adrenaline, C- |               |
| yes | yes | DM             | -           | no  | Adreanlin      | -             |
| no  | yes | intubation     | no reflexes | no  | Adrenaline, A- |               |
| yes | yes | intubation     | no reflexes | no  | Adrenaline     | -             |
| no  | yes | oxygen face r- |             | no  | -              | Adrenaline    |
| yes | yes | intubation     | no reflexes | no  | Adrenaline, C- |               |
| no  | yes | DM             | -           | no  | unspecified C- |               |
| yes | yes | LAMA           | -           | no  | Adrenaline     | -             |
| yes | yes | intubation     | no reflexes | no  | Adrenaline     | Adrenaline, C |
| no  | yes | DM             | -           | no  | Adrenaline     | -             |
| yes | yes | intubation     | no reflexes | no  | Adrenaline     | -             |
| no  | yes | intubation     | no reflexes | no  | -              | -             |
| no  | yes | intubation     | no reflexes | yes | Adrenaline, N  | Adrenaline    |
| yes | yes | LAMA           | -           | no  | Adrenaline, N  | Adrenaline    |
| yes | yes | DM             | -           | no  | Adrenaline     | Adrenaline, C |
| no  | yes | intubation     | no reflexes | yes | Adrenaline     | -             |
| yes | yes | intubation     | no reflexes | no  | Adrenaline     | Adrenaline    |
| no  | no  | no             | -           | no  | -              | -             |
| no  | no  | intubation     | anaesthesia | yes | -              | FFP, EK       |
| no  | yes | intubation     | no reflexes | no  | Adrenaline     | Adrenaline, V |
| no  | yes | intubation     | no reflexes | no  | Adrenaline     | -             |



| ECG | ECG findings               | Defibrillation | Imaging          | Suspected cause of death |
|-----|----------------------------|----------------|------------------|--------------------------|
| yes | PEA                        | no             | no               | cerebrovascular          |
| yes | PEA                        | yes            | DM               | unclear cause of death   |
| yes | ventricular fibrillation   | yes            | no               | pulmonary                |
| yes | asystole                   | yes            | no               | suspected suicide        |
| yes | tc sinus rhythm            | no             | X-ray thorax     | cerebrovascular          |
| yes | PEA, asystole              | yes            | no               | suspected suicide        |
| yes | ventricular fibrillation   | yes            | no               | cardiovascular           |
| yes | tc sinus rhythm            | no             | X-ray thorax     | neoplasia                |
| yes | ventricular tachycardia    | no             | no               | cardiovascular           |
| no  | -                          | no             | no               | neoplasia                |
| yes | ventricular fibrillation   | yes            | no               | cardiovascular           |
| yes | PEA, ST segment depression | no             | echocardiography | cardiovascular           |
| yes | PEA                        | yes            | no               | cardiovascular           |
| yes | PEA                        | no             | echocardiography | unclear cause of death   |
| yes | PEA, ROSC                  | yes            | no               | cardiovascular           |
| yes | tc sinus rhythm            | no             | no               | neoplasia                |
| yes | asystole                   | no             | no               | suspected suicide        |
| yes | ventricular fibrillation   | yes            | no               | cardiovascular           |
| yes | PEA                        | yes            | no               | unclear cause of death   |
| yes | ventricular fibrillation   | yes            | no               | cardiovascular           |
| no  | -                          | no             | X-ray thorax,    | cardiovascular           |
| yes | PEA                        | no             | FAST             | accident                 |
| yes | ST segment depression      | no             | sonography a     | cardiovascular           |
| no  | -                          | no             | no               | neoplasia                |
| yes | PEA                        | no             | no               | unclear cause of death   |
| yes | PEA                        | no             | no               | cardiovascular           |
| yes | PEA                        | no             | no               | accident                 |
| yes | ventricular fibrillation   | yes            | no               | accident                 |
| no  | -                          | no             | CT               | neoplasia                |
| yes | -                          | yes            | FAST             | cardiovascular           |
| yes | asystole, ROSC             | no             | echocardiography | cardiovascular           |
| no  | -                          | no             | sonography a     | neoplasia                |
| yes | ventricular fibrillation   | yes            | no               | cardiovascular           |
| yes | ventricular fibrillation   | yes            | no               | cardiovascular           |
| yes | ventricular fibrillation   | yes            | no               | cardiovascular           |
| yes | PEA                        | no             | no               | cardiovascular           |
| no  | -                          | no             | FAST, LODOX      | suspected suicide        |
| yes | nc sinus rhythm            | no             | FAST, X-ray th   | cardiovascular           |
| yes | PEA                        | no             | FAST, CT         | accident                 |
| yes | bc sinus rhythm            | no             | no               | abdominal                |
| yes | asystole, PEA              | yes            | sonography a     | unclear cause of death   |
| yes | PEA, tc sinus              | no             | CT               | neoplasia                |
| yes | Torsade de Pointes         | no             | no               | unclear cause of death   |

|     |                   |     |                |                        |
|-----|-------------------|-----|----------------|------------------------|
| yes | PEA               | no  | FAST, X-ray th | abdominal              |
| yes | -                 | no  | CT             | cerebrovascular        |
| yes | asystole, vent    | yes | no             | unclear cause of death |
| yes | tc atrial fibrill | yes | no             | cardiovascular         |
| yes | ventricular fit   | no  | no             | unclear cause of death |
| yes | asystole, ROS     | no  | no             | unclear cause of death |
| yes | PEA               | no  | FAST           | cardiovascular         |
| yes | asystole          | no  | no             | unclear cause of death |
| yes | PEA, ventricu     | yes | echocardiogr   | cardiovascular         |
| yes | asystole          | no  | FAST           | accident               |
| yes | -                 | no  | CT             | cerebrovascular        |
| yes | ventricular fit   | yes | sonography a   | cardiovascular         |
| yes | PEA, ROSC, S1     | no  | coronary ang   | cardiovascular         |
| yes | asystole          | no  | no             | accident               |
| yes | PEA, ventricu     | yes | FAST, echoca   | cardiovascular         |
| yes | PEA               | no  | no             | unclear cause of death |
| yes | ventricular fit   | no  | Lodox, FAST    | suspected suicide      |
| yes | ventricular fit   | yes | no             | cardiovascular         |
| yes | asystole, vent    | yes | no             | cardiovascular         |
| yes | ventricular fit   | yes | no             | unclear cause of death |
| yes | ventricular fit   | yes | echocardiogr   | cardiovascular         |
| yes | PEA               | no  | no             | unclear cause of death |
| yes | -                 | no  | CT             | cerebrovascular        |
| yes | PEA, ventricu     | yes | echocardiogr   | unclear cause of death |
| no  | -                 | no  | CT             | cerebrovascular        |
| yes | AV Block 3, in    | no  | echocardiogr   | cardiovascular         |
| yes | nc sinus rhyt     | yes | no             | cardiovascular         |
| no  | -                 | no  | Lodox, FAST,   | suspected suicide      |
| yes | ventricular fit   | yes | echocardiogr   | unclear cause of death |
| yes | ventricular fit   | yes | echocardiogr   | unclear cause of death |
| yes | PEA               | no  | echocardiogr   | intoxication           |
| no  | -                 | no  | no             | cerebrovascular        |
| yes | PEA               | no  | no             | unclear cause of death |
| yes | asystole, PEA     | no  | no             | cardiovascular         |
| yes | ventricular fit   | yes | no             | cardiovascular         |
| yes | asystole, PEA     | no  | echocardiogr   | unclear cause of death |
| yes | PEA               | no  | no             | cardiovascular         |
| no  | -                 | no  | CT             | cerebrovascular        |
| yes | PEA, asystole     | no  | echocardiogr   | unclear cause of death |
| yes | nc sinus rhyt     | no  | CT             | cerebrovascular        |
| yes | asystole, PEA     | no  | X-ray thorax,  | cardiovascular         |
| yes | ventricular fit   | yes | no             | cardiovascular         |
| yes | asystole, ROS     | no  | no             | cardiovascular         |
| yes | ventricular fit   | yes | echocardiogr   | cardiovascular         |

|     |                   |     |                                      |
|-----|-------------------|-----|--------------------------------------|
| no  | -                 | no  | X-ray thorax, neoplasia              |
| yes | PEA               | no  | echocardiogr cardiovascular          |
| yes | ventricular fit   | yes | echocardiogr unclear cause of death  |
| yes | PEA               | no  | echocardiogr cardiovascular          |
| yes | ventricular fit   | yes | no unclear cause of death            |
| yes | ventricular fit   | yes | coronary ang cardiovascular          |
| yes | tc sinus rhyth    | no  | no pulmonary                         |
| yes | asystole, PEA     | yes | sonography a cardiovascular          |
| no  | -                 | no  | no pulmonary                         |
| yes | ventricular fit   | yes | no cardiovascular                    |
| no  | -                 | no  | FAST, LODOX suspected suicide        |
| yes | PEA, atrial fib   | no  | no cardiovascular                    |
| yes | ventricular fit   | yes | no unclear cause of death            |
| yes | ventricular fit   | yes | echocardiogr unclear cause of death  |
| yes | asystole          | no  | FAST cardiovascular                  |
| no  | -                 | no  | no neoplasia                         |
| yes | ventricular fit   | yes | echocardiogr unclear cause of death  |
| yes | atrial fibrillati | no  | no cerebrovascular                   |
| yes | asystole, venti   | yes | echocardiogr unclear cause of death  |
| yes | atrial fibrillati | no  | X-ray thorax cerebrovascular         |
| yes | sinus rhythm, no  |     | CT cardiovascular                    |
| yes | atrial fibrillati | no  | CT, echocardi cerebrovascular        |
| yes | sinus rhythm      | no  | sonography a cardiovascular          |
| yes | tc sinus rhyth    | no  | no cerebrovascular                   |
| yes | ventricular fit   | yes | echocardiogr unclear cause of death  |
| yes | PEA, ventricu     | yes | echocardiogr cardiovascular          |
| yes | PEA, ROSC         | no  | echocardiogr cardiovascular          |
| yes | tc sinus rhyth    | no  | CT cardiovascular                    |
| yes | asystole, PEA     | no  | echocardiogr unclear cause of death  |
| yes | ventricular fit   | yes | no cardiovascular                    |
| yes | ventricular fit   | yes | echocardiogr unclear cause of death  |
| yes | ventricular fit   | yes | echocardiogr unclear cause of death  |
| yes | ventricular fit   | yes | echocardiogr cardiovascular          |
| yes | PEA               | no  | echocardiogr cardiovascular          |
| yes | PEA, asystole     | no  | echocardiogr unclear cause of death  |
| yes | -                 | no  | FAST, X-ray th accident              |
| yes | nc sinus rhyth    | no  | CT cardiovascular                    |
| yes | PEA               | no  | echocardiogr cardiovascular          |
| yes | asystole          | yes | echocardiogr cardiovascular          |
| yes | ventricular fit   | yes | echocardiogr unclear cause of death  |
| yes | PEA, pacing rl    | no  | sonography a abdominal               |
| yes | PEA, atrial fib   | no  | CT, sonograpl unclear cause of death |
| yes | asystole          | no  | no unclear cause of death            |
| yes | PEA, ROSC         | no  | echocardiogr cardiovascular          |

|     |                  |     |                |                        |
|-----|------------------|-----|----------------|------------------------|
| yes | PEA, asystole    | no  | echocardiogr   | unclear cause of death |
| yes | PEA              | no  | echocardiogr   | cardiovascular         |
| yes | ventricular fit  | yes | echocardiogr   | cardiovascular         |
| yes | STEMI (inferio   | no  | echocardiogr   | cardiovascular         |
| yes | ST segment d     | no  | FAST, X-ray th | cardiovascular         |
| yes | tc sinus rhythm  | no  | echocardiogr   | cardiovascular         |
| yes | asystole, venti  | yes | no             | unclear cause of death |
| yes | tc sinus rhythm  | no  | no             | cardiovascular         |
| yes | ventricular fit  | yes | echocardiogr   | cardiovascular         |
| yes | ventricular fit  | yes | no             | unclear cause of death |
| yes | PEA, asystole    | no  | no             | cerebrovascular        |
| yes | PEA, asystole    | no  | echocardiogr   | unclear cause of death |
| yes | ventricular fit  | yes | no             | cardiovascular         |
| yes | sinus rhythm, no |     | echocardiogr   | cardiovascular         |
| yes | ventricular fit  | yes | echocardiogr   | cardiovascular         |
| yes | ventricular fit  | yes | echocardiogr   | cardiovascular         |
| yes | ventricular fit  | yes | no             | unclear cause of death |
| yes | ventricular fit  | yes | echocardiogr   | cardiovascular         |
| yes | asystole, ROS    | yes | no             | unclear cause of death |
| yes | asystole         | yes | echocardiogr   | unclear cause of death |
| yes | PEA              | no  | no             | neoplasia              |
| yes | PEA, asystole    | no  | FAST           | unclear cause of death |
| yes | asystole         | no  | no             | unclear cause of death |
| yes | asystole         | yes | no             | unclear cause of death |
| yes | asystole, PEA    | no  | FAST, echoca   | accident               |
| yes | asystole         | no  | echocardiogr   | cardiovascular         |
| no  | -                | no  | no             | cardiovascular         |
| no  | -                | no  | FAST, CT       | accident               |
| yes | PEA, ventricu    | yes | FAST, echoca   | cardiovascular         |
| yes | asystole, venti  | yes | FAST, echoca   | unclear cause of death |

**Use of Lucas™"**

no

yes



no  
yes  
no  
no  
no  
yes  
no  
yes  
no  
no  
no  
no  
yes  
yes  
no  
no  
yes  
no  
no  
no  
no  
no  
no  
yes  
no  
yes  
no  
yes  
yes  
yes  
yes  
yes  
yes  
no  
no  
yes  
no  
yes  
no  
yes  
yes  
yes

yes  
yes  
yes  
no  
no  
yes  
no  
no  
yes  
no  
no  
yes  
yes  
no  
yes  
yes  
no  
yes  
yes  
yes  
yes  
yes  
yes  
yes  
no  
no  
yes  
yes
